# Supplementary material for: Change in Kidney Function and 2-Year Mortality After Transcatheter Aortic Valve Replacement
Source: PubMed Central journal article supplement (PMC7998079; doi:10.1001/jamanetworkopen.2021.3296), 2021-03-26
Supplement: jamanetwopen-e213296-s001.pdf [file jamanetwopen-e213296-s001.pdf]

## Supplementary Online Content

Witberg G, Steinmetz T, Landes U, et al. Change in kidney function and 2-year mortality after transcatheter aortic valve replacement. *JAMA Netw Open*. 2021;4(3):e213296. doi:10.1001/jamanetworkopen.2021.3296

**eFigure 1.** Cohort Selection Process for Steady State and Periprocedural Analysis

**eFigure 2.** Steady-State Change in Renal Function According to Baseline eGFR

**eFigure 3.** Distribution of State Change in Renal Function After TAVR

**eFigure 4.** Steady-State eGFR According to Baseline eGFR

**eFigure 5.** Kaplan-Meier Curves for 2-Year Mortality According to Steady-State Changes in Renal Function<sup>a</sup>

**eFigure 6.** ROC Curves for Prediction Models for Steady-State Renal Function Deterioration (left) and CKD Status Resolution After TAVR

**eTable 1.** Periprocedural Complications According to Steady-State Change in eGFR Category

**eTable 2.** Periprocedural Complications According to AKI Category

**eTable 3.** Predictors of Periprocedural/Steady-State Changes in eGFR Function After TAVI

This supplementary material has been provided by the authors to give readers additional information about their work.

**eFigure 1.** Cohort Selection Process for Steady State and Periprocedural Analysis

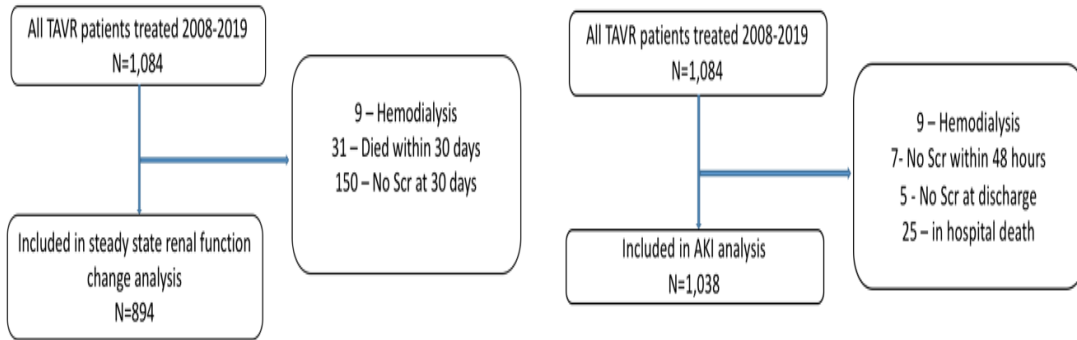

**eFigure 2.** Steady-State Change in Renal Function According to Baseline eGFR

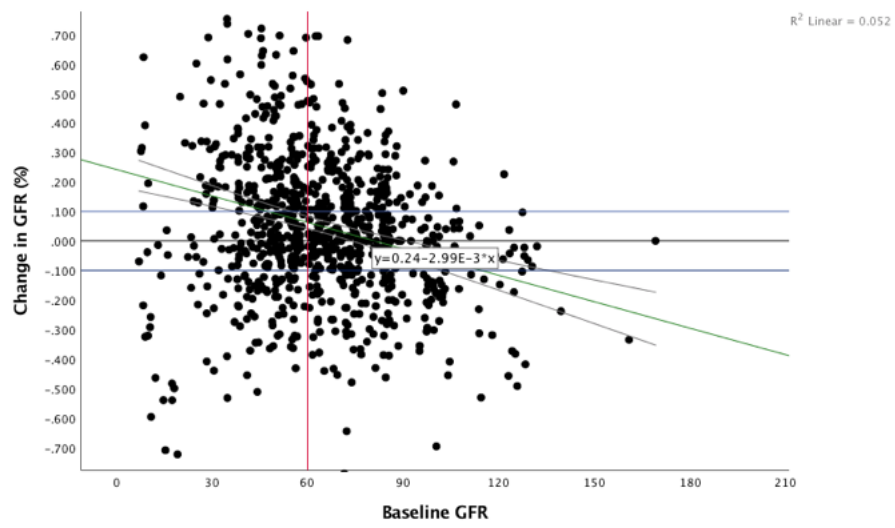

**eFigure 3.** Distribution of State Change in Renal Function After TAVR

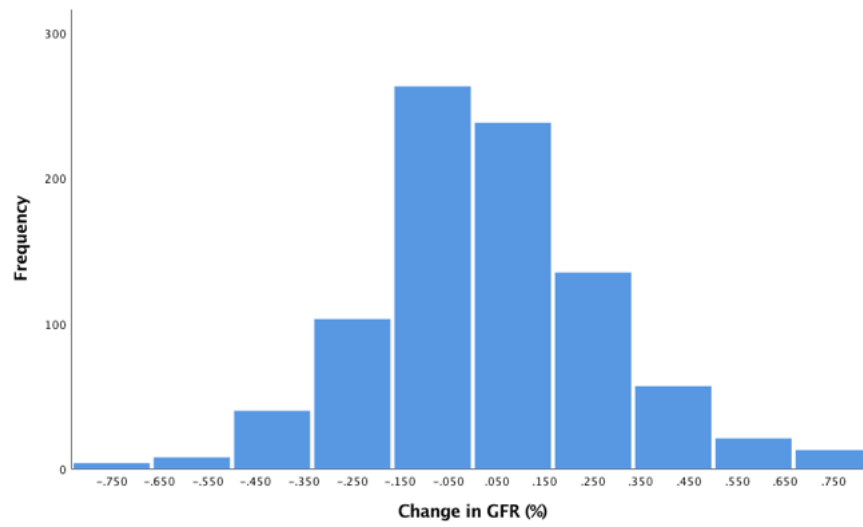

**eFigure 4.** Steady-State eGFR According to Baseline eGFR

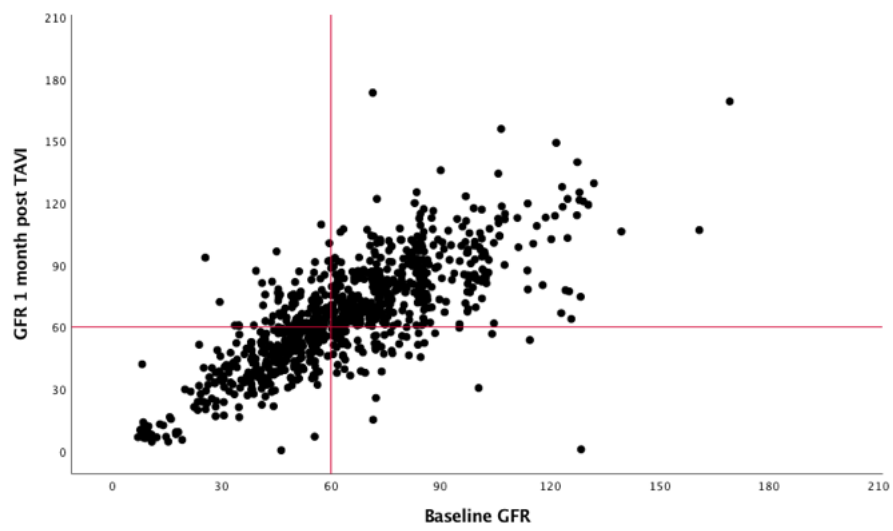

**eFigure 5.** Kaplan-Meier Curves for 2-Year Mortality According to Steady-State Changes in Renal Function<sup>a</sup>

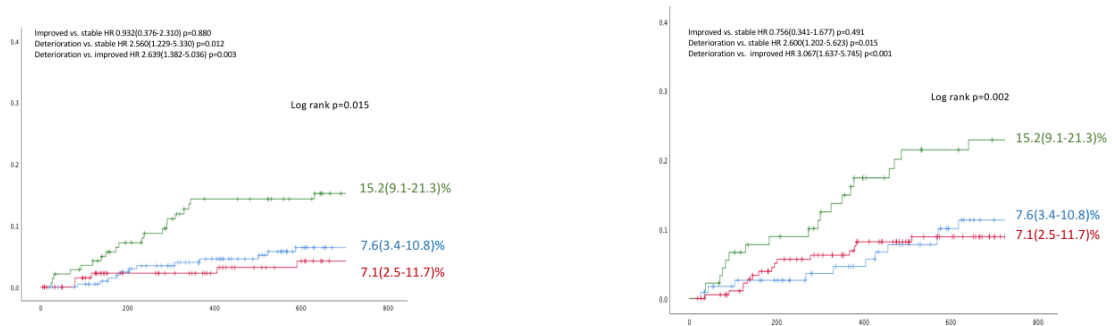

<sup>a</sup>Baseline eGFR  $\geq 60$  mL/min (left) and eGFR  $< 60$  mL/min (right).

**eFigure 6.** ROC Curves for Prediction Models for Steady-State Renal Function Deterioration (left) and CKD Status Resolution After TAVR

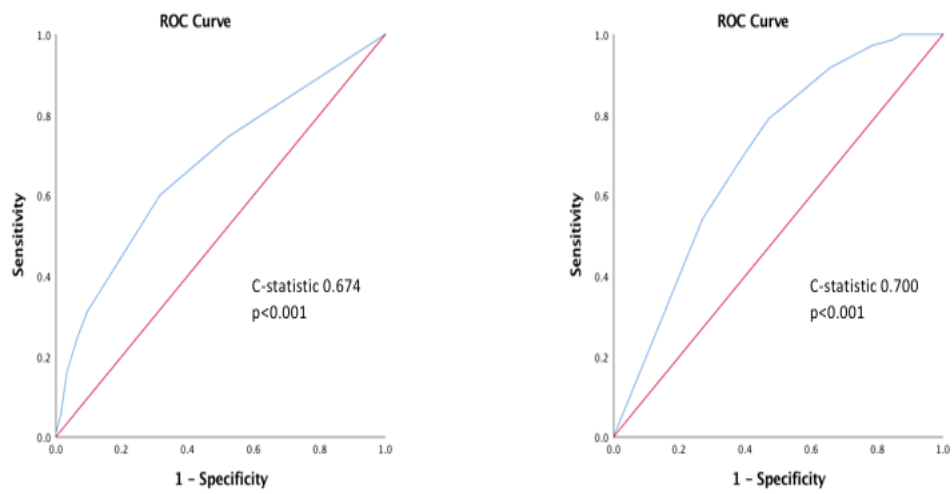

**eTable 1.** Periprocedural Complications According to Steady-State Change in eGFR Category

|                        | Stable GFR<br>N=332 | GFR<br>improvement<br>N=329 | GFR<br>deterioration<br>N=233 | P value |
|------------------------|---------------------|-----------------------------|-------------------------------|---------|
| Vascular complications |                     |                             |                               | 0.312   |
| Minor                  | 53(16.0%)           | 54(16.5%)                   | 40(12.9%)                     |         |
| Major                  | 5(1.5%)             | 12(3.7%)                    | 8(3.4%)                       |         |
| Bleeding complications |                     |                             |                               | 0.17    |
| Minor                  | 8(1.4%)             | 14(4.3%)                    | 6(2.6%)                       |         |
| Major                  | 4(1.2%)             | 7(2.1%)                     | 3(1.3%)                       |         |
| Life threatening       | 0(0%)               | 0(0%)                       | 2(0.9%)                       |         |
| Pacemaker implantation | 41(12.3%)           | 42(12.8%)                   | 30(12.9%)                     | 0.98    |

eGFR=estimated glomerular filtration rate

**eTable 2.** Periprocedural Complications According to AKI Category

|                        | No AKI<br>N=921 | AKI<br>N=115 | P value |
|------------------------|-----------------|--------------|---------|
| Vascular complications |                 |              | <0.01   |
| Minor                  | 143(15.5%)      | 17(14.7%)    |         |
| Major                  | 15(1.6%)        | 14(12.1%)    |         |
| Bleeding complications |                 |              | <0.01   |
| Minor                  | 9(1.0%)         | 3(2.6%)      |         |
| Major                  | 16(1.7%)        | 4(3.5%)      |         |
| Life threatening       | 1(0.1%)         | 3(2.6%)      |         |
| Pacemaker implantation | 111(12.1%)      | 20(17.3%)    | 0.14    |

AKI=acute kidney injury



**eTable 3.** Predictors of Periprocedural/Steady State-Changes in eGFR

Function After TAVI

|                                                    | OR   | 95% CI     | P value |
|----------------------------------------------------|------|------------|---------|
| <b>A AKI resolution</b>                            |      |            |         |
| No frailty                                         | 4.77 | 1.44-15.79 | 0.01    |
| Age<80                                             | 8.20 | 2.70-14.64 | <0.01   |
| <b>B Steady state renal function deterioration</b> |      |            |         |
| STS                                                | 1.06 | 1.02-1.09  | 0.01    |
| STS>6                                              | 1.43 | 1.03-1.98  | 0.03    |
| GFR (per 1ml/min)                                  | 1.01 | 1.01-1.02  | <0.01   |
| GFR>75 ml/min                                      | 1.92 | 1.40-2.62  | <0.01   |
| AKI resolved at discharge                          | 2.82 | 1.70-4.70  | <0.01   |
| AKI not resolved at discharge                      | 7.32 | 4.53-11.42 | <0.01   |
| <b>C Steady state renal function improvement</b>   |      |            |         |
| Female                                             | 1.27 | 1.03-1.61  | 0.04    |
| GFR<60                                             | 2.28 | 1.73-3.01  | <0.01   |
| <b>D Steady state CKD resolution</b>               |      |            |         |
| STS                                                | 0.87 | 0.81-0.94  | <0.01   |
| STS<6                                              | 1.81 | 1.10-2.97  | 0.02    |
| LVEF                                               | 1.04 | 1.01-1.08  | 0.02    |
| LVEF>50%                                           | 2.15 | 1.11-4.18  | 0.02    |
| GFR                                                | 1.12 | 1.08-1.16  | <0.01   |
| GFR>45 ml/min                                      | 3.13 | 1.83-6.92  | <0.01   |
| Contrast/GFR                                       | 1.40 | 1.14-1.72  | <0.01   |
| Contrast/GFR<3.5                                   | 4.03 | 2.11-7.69  | <0.01   |
| No AKI at discharge                                | 4.62 | 2.15-6.44  | <0.01   |

AKI=acute kidney injury GFR=glomerular filtration rate LVEF=left ventricle ejection fraction STS=society of thoracic surgeons
